# Supplementary material for: Prolyl endopeptidase contributes to early neutrophilic inflammation in acute myocardial transplant rejection
Source: JCI journal article supplement (doi:10.1172/jci.insight.139687), 2021-02-11
Supplement: sd1 [file 1]

## Supplementary Information:

### **Prolyl Endopeptidase contributes to early neutrophilic inflammation in acute cardiac transplant rejection**

Gregory A. Payne MD, PhD<sup>1-5\*</sup>, Nirmal S. Sharma MD<sup>6,14</sup>, Charitharth V. Lal MD<sup>4,7</sup>, Chunyan Song<sup>1</sup>, Lingling Guo MD<sup>8,9</sup>, Camilla Margaroli PhD<sup>4,10</sup>, Liliana Viera<sup>4,10,11</sup>, Siva Kumar MD<sup>6,13</sup>, Jindong Li<sup>4,10</sup>, Dongqi Xing MD, PhD<sup>2,4,10</sup>, Melanie Bosley<sup>13</sup>, Xin Xu MD, PhD<sup>4,10</sup>, J. Michael Wells MD<sup>4,5,10,11</sup>, James F. George PhD<sup>8,9</sup>, Jose Tallaj MD<sup>1,3</sup>, Massoud Leesar MD<sup>1,3</sup>, J. Edwin Blalock PhD<sup>2,4,10-12†</sup> and Amit Gaggar MD, PhD<sup>2,4,5,10-12†</sup>

<sup>1</sup>*Division of Cardiovascular Disease, Department of Medicine, University of Alabama at Birmingham, Birmingham, AL*

<sup>2</sup>*Vascular Biology and Hypertension Program, University of Alabama at Birmingham, Birmingham, AL*

<sup>3</sup>*Comprehensive Cardiovascular Center, University of Alabama at Birmingham, Birmingham, AL*

<sup>4</sup>*Program in Protease and Matrix Biology, University of Alabama at Birmingham, Birmingham, AL*

<sup>5</sup>*Medical Service at Birmingham VA Medical Center, Birmingham, AL*

<sup>6</sup>*Department of Internal Medicine, University of South Florida, Tampa, FL*

<sup>7</sup>*Division of Neonatology, Department of Pediatrics, University of Alabama at Birmingham, Birmingham, AL*

<sup>8</sup>*Department of Surgery, University of Alabama at Birmingham, Birmingham, AL*

<sup>9</sup>*Nephrology Research & Training Center, Division of Nephrology, Department of Medicine, University of Alabama at Birmingham, Birmingham, AL*

<sup>10</sup>*Division of Pulmonary, Allergy & Critical Care Medicine, Department of Medicine, University of Alabama at Birmingham, Birmingham, AL*

<sup>11</sup>*Lung Health Center, University of Alabama at Birmingham, Birmingham, AL*

<sup>12</sup>*Department of Cell, Developmental, and Integrative Biology, University of Alabama at Birmingham, Birmingham, AL*

<sup>13</sup>*Tampa General Hospital, Tampa, FL*

<sup>14</sup>*Brigham and Women's Hospital, Harvard Medical School, Boston, MA*

*\*denotes corresponding authors*

*†denotes equal contribution*

**Conflict of Interest:** The authors have declared that no conflict of interest exists

### **Corresponding Author**

**Gregory A. Payne MD PhD**  
Zeigler Research Building 531  
1720 2<sup>nd</sup> Avenue South  
Birmingham, AL 35294  
gpayne@uabmc.edu

## SUPPLEMENTAL FIGURE LEGENDS

### **Supplemental Figure 1. Acute allograft transplant rejection induces neutrophilic inflammation.**

8-10 week-old, male, BALB/cj mice received heterotopic heart transplants from similarly aged BALB/cj (isograft) or C57BL/6j (allograft) donor mice. Mice were sacrificed 3 days post-transplant. **A-F** illustrates representative images of hematoxylin and eosin and immunohistochemical staining. Compared to syngeneic isografts (**A-C**), allografts were observed to have marked intramyocardial and perivascular inflammatory cell invasion (**D and E**). Staining for the neutrophil marker MPO revealed significant extracellular neutrophil invasion within allografts (**F**) in comparison to isografts (**C**). This neutrophilic response was further quantified by direct neutrophil cell counts (**G**,  $n = 4$ ), as well as direct measurement of allograft MPO expression by ELISA (**H**,  $n = 5$ ). In addition to induction of PE expression (**Figure 1**), acute rejection within allografts caused a marked increase in total matrix metalloprotease (MMP) 9 expression (**I**,  $n = 7$ ) and activity (**J**,  $n = 6$ ). Together, these findings confirm a neutrophilic response and induction of MMP9 (a key protease associated with PGP generation) during acute allograft rejection. Results presented as mean  $\pm$  SE. Where indicated,  $n$  represents animals/group. Student's unpaired t-test was used for each comparison.

### **Supplemental Figure 2. Acute allograft transplant rejection induces local PE expression.**

8-10 week-old, male, BALB/cj mice received heterotopic heart transplants from similarly aged BALB/cj (isograft) or C57BL/6j (allograft) donor mice. Mice were sacrificed 3 days post-transplant. **A-F** illustrates representative images of myocardial tissue sections immunohistochemically stained for PE or an isotype control. Compared to syngeneic isografts (**A and B**), allografts were observed to have significant immune cell infiltration that was associated with a marked increase in extracellular PE expression (**D and E**).



**Supplemental Figure 3. PE inhibition attenuates allograft inflammatory response.** Allograft mice were treated with Z-Pro-Prolinal (ZPP, 10mg/kg i.p.) or a 2% DMSO vehicle control. Compared to DMSO-treated mice, ZPP reduced key pro-inflammatory mediators (**Figure 2**). The Th2 promoting cytokine IL-4 showed a non-significant reduction with ZPP (**A**). Interestingly, the innate cytokine IL-1 $\beta$  was also significantly reduced (**B**) and associated with a trend towards reduced IL-6 production (**C**).  $n = 5$  animals/group. Results presented as mean  $\pm$  SE. Student's unpaired t-test was used for each comparison.

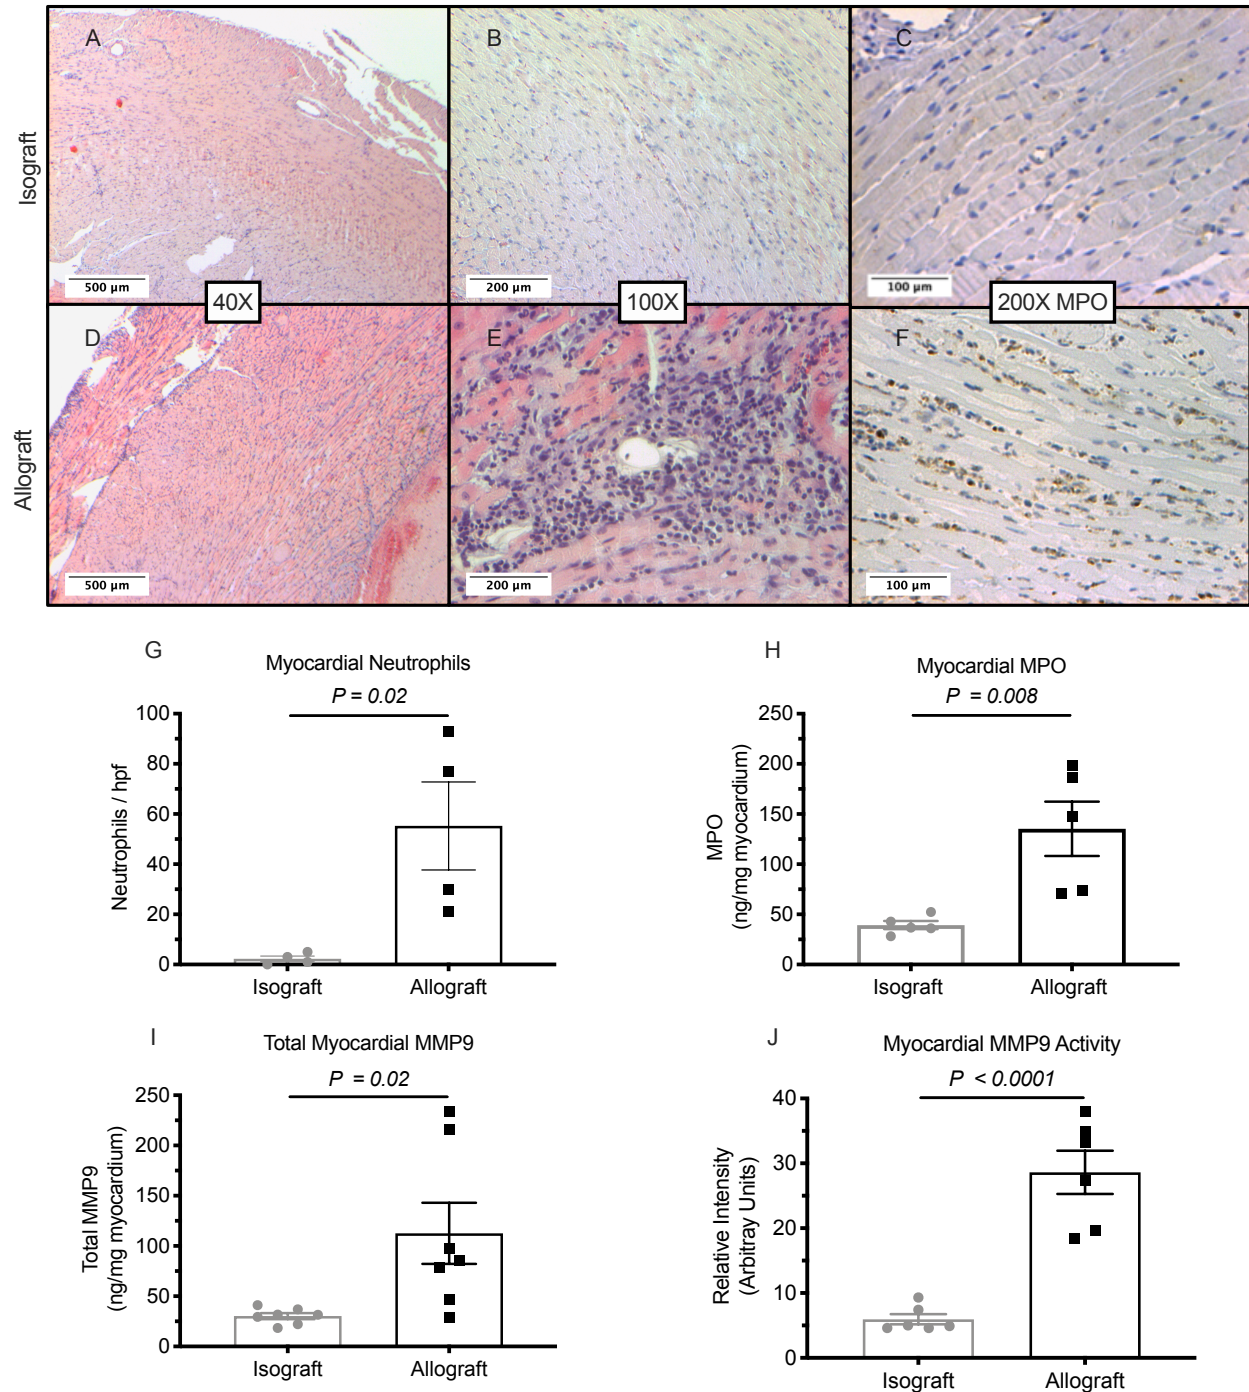

**Supplemental Figure 1. Acute allograft transplant rejection induces neutrophilic inflammation.** 8-10 week-old, male, BALB/cj mice received heterotopic heart transplants from similarly aged BALB/cj (isograft) or C57BL/6j (allograft) donor mice. Mice were sacrificed 3 days post-transplant. **A-F** illustrates representative images of hematoxylin and eosin and immunohistochemical staining. Compared to syngeneic isografts (**A-C**), allografts were observed to have marked intramyocardial and perivascular inflammatory cell invasion (**D and E**). Staining for the neutrophil marker MPO revealed significant extracellular neutrophil invasion within allografts (**F**) in comparison to isografts (**C**). This neutrophilic response was further quantified by direct neutrophil cell counts (**G**,  $n = 4$ ), as well as direct measurement of allograft MPO expression by ELISA (**H**,  $n = 5$ ). In addition to induction of PE expression (**Figure 1**), acute rejection within allografts caused a marked increase in total matrix metalloprotease (MMP) 9 expression (**I**,  $n = 7$ ) and activity (**J**,  $n = 6$ ). Together, these findings confirm a neutrophilic response and induction of MMP9 (a key protease associated with PGP generation) during acute allograft rejection. Results presented as mean  $\pm$  SE. Where indicated,  $n$  represents animals/group. Student's unpaired t-test was used for each comparison.



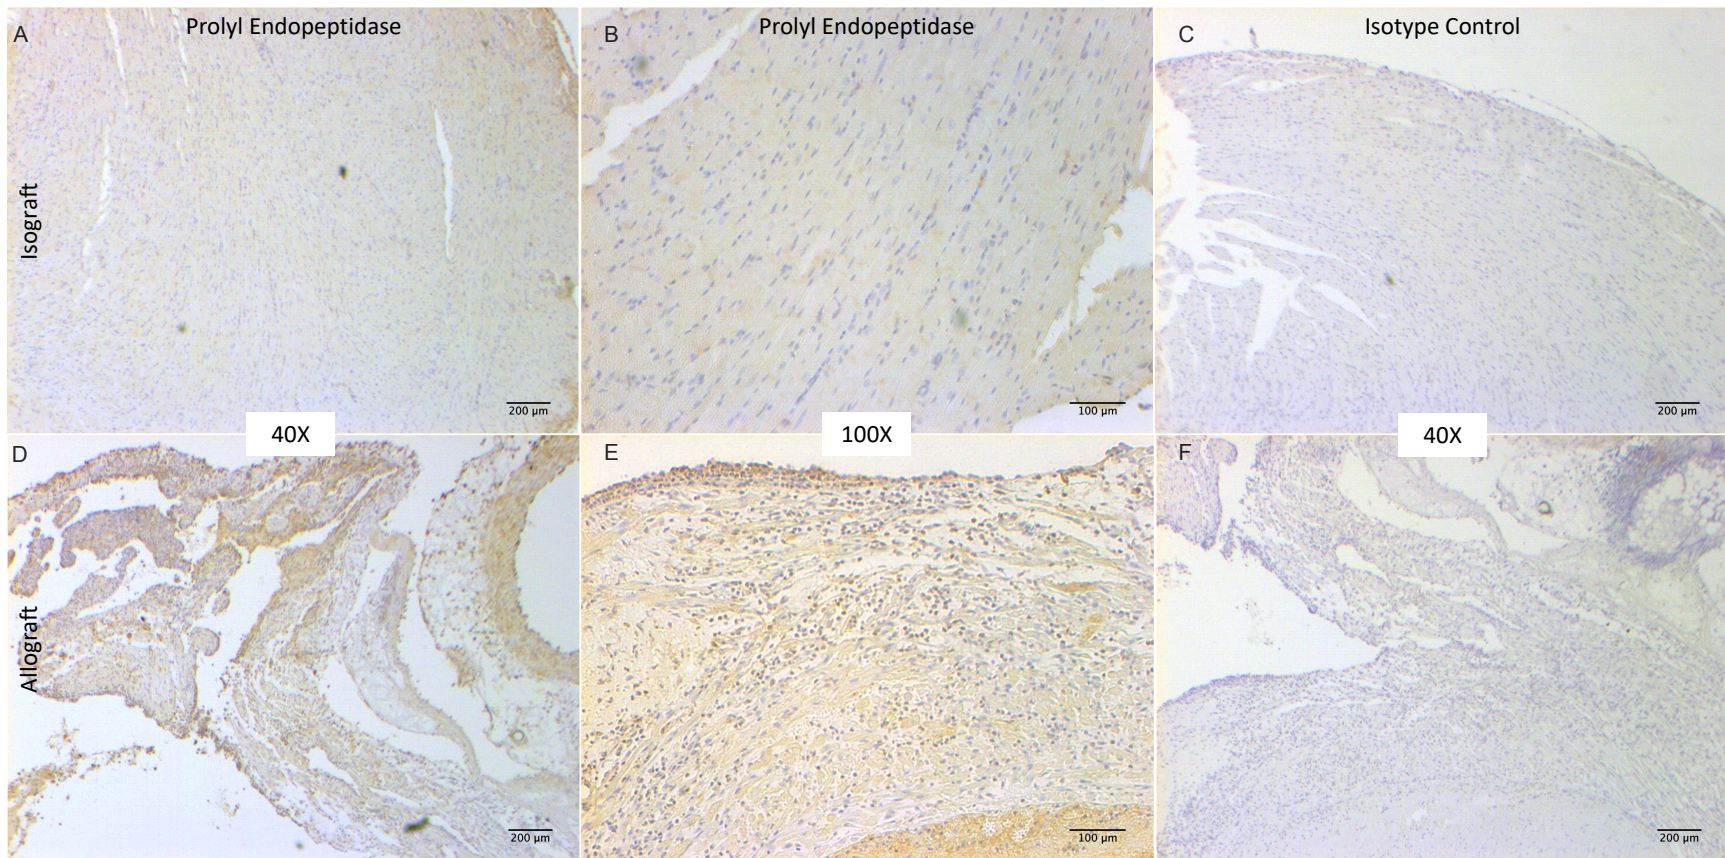

**Supplemental Figure 2. Acute allograft transplant rejection induces local PE expression.** 8-10 week-old, male, BALB/cj mice received heterotopic heart transplants from similarly aged BALB/cj (isograft) or C57BL/6j (allograft) donor mice. Mice were sacrificed 3 days post-transplant. **A-F** illustrates representative images of myocardial tissue sections immunohistochemically stained for PE or an isotype control. Compared to syngeneic isografts (**A and B**), allografts were observed to have significant immune cell infiltration that was associated with a marked increase in extracellular PE expression (**D and E**).

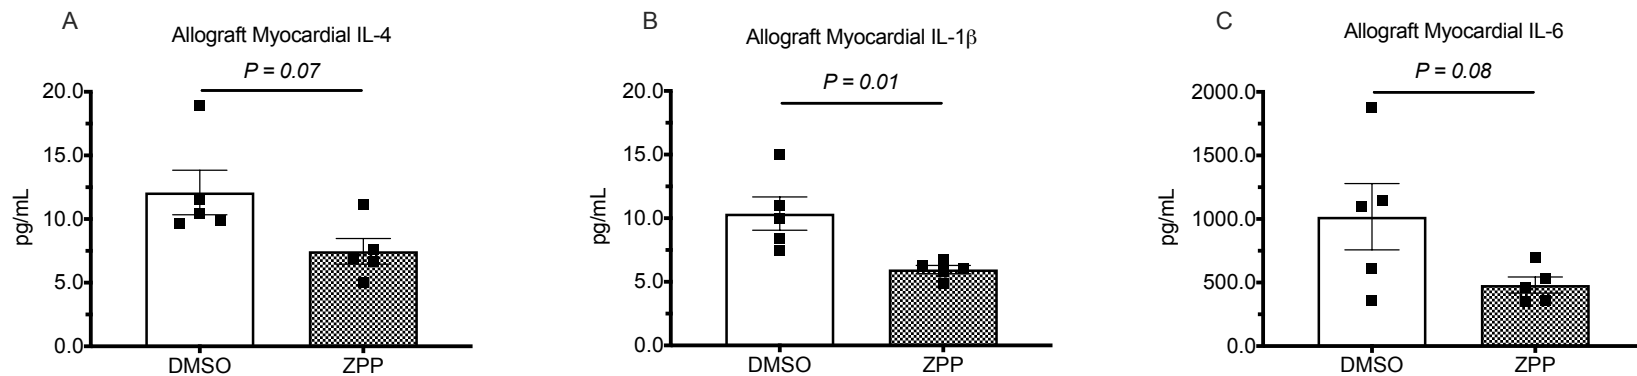

**Supplemental Figure 3. PE inhibition attenuates allograft inflammatory response.** Allograft mice were treated with Z-Pro-Prolinal (ZPP, 10mg/kg i.p.) or a 2% DMSO vehicle control. Compared to DMSO-treated mice, ZPP reduced key pro-inflammatory mediators (**Figure 2**). The Th2 promoting cytokine IL-4 showed a non-significant reduction with ZPP (**A**). Interestingly, the innate cytokine IL-1 $\beta$  was also significantly reduced (**B**) and associated with a trend towards reduced IL-6 production (**C**).  $n = 5$  animals/group. Results presented as mean  $\pm$  SE. Student's unpaired t-test was used for each comparison.
